# Supplementary material for: Environmentally sustainable moisture energy harvester with chemically networked cellulose nanofiber
Source: Royal Society of Chemistry journal article supplement (doi:10.1039/d4ee01881h), 2024-01-01
Supplement: d4ee01881h5.pdf [file d4ee01881h5.pdf]

## Electronic Supplementary Information

### **Environmentally sustainable moisture energy harvester with chemically networked cellulose nanofiber**

EunAe Shin,<sup>a,b</sup> Gwanho Kim,<sup>a</sup> Kaiying Zhao,<sup>a</sup> Guangtao Zan,<sup>a</sup> HoYeon Kim,<sup>a</sup> Shengyou Li,<sup>a</sup> Junhyuk Lee,<sup>b</sup> DongHo Kang,<sup>b</sup> Jin Woo Oh,<sup>a</sup> Jeyoung Jung,<sup>b</sup> Jin Kie Shim,<sup>\*b</sup> and Cheolmin Park<sup>\*a</sup>

<sup>a</sup> Department of Materials Science and Engineering, Yonsei University, Yonsei-ro 50, Seodaemun-gu, Seoul, 03722, Korea.

<sup>b</sup> Korea Packaging Center, Korea Institute of Industrial Technology, Bucheon, 14449, Republic of Korea.

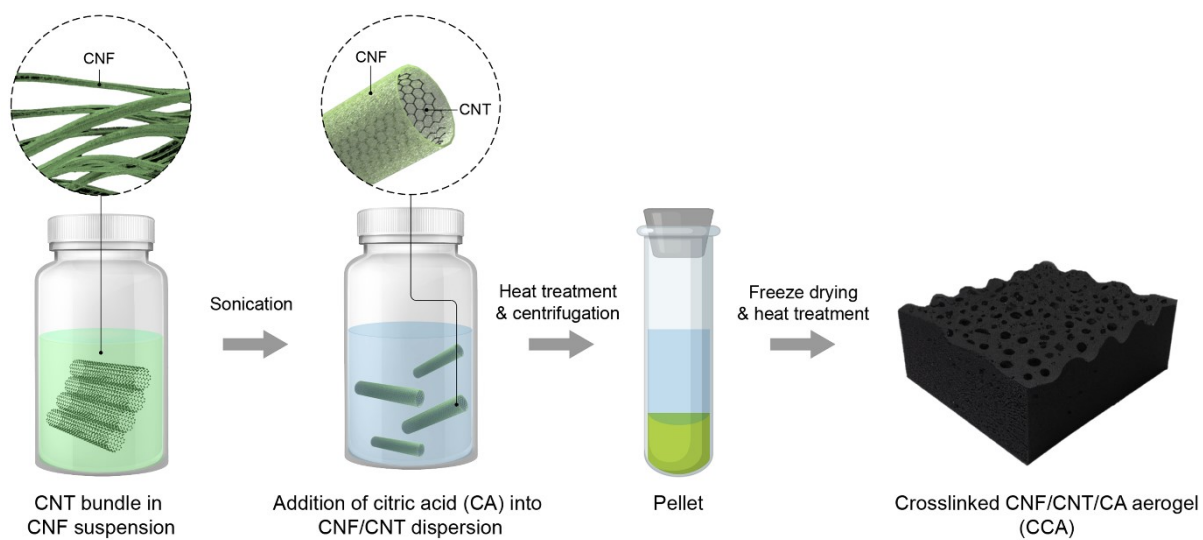

**Fig. S1** Schematic diagram of CCA fabrication.

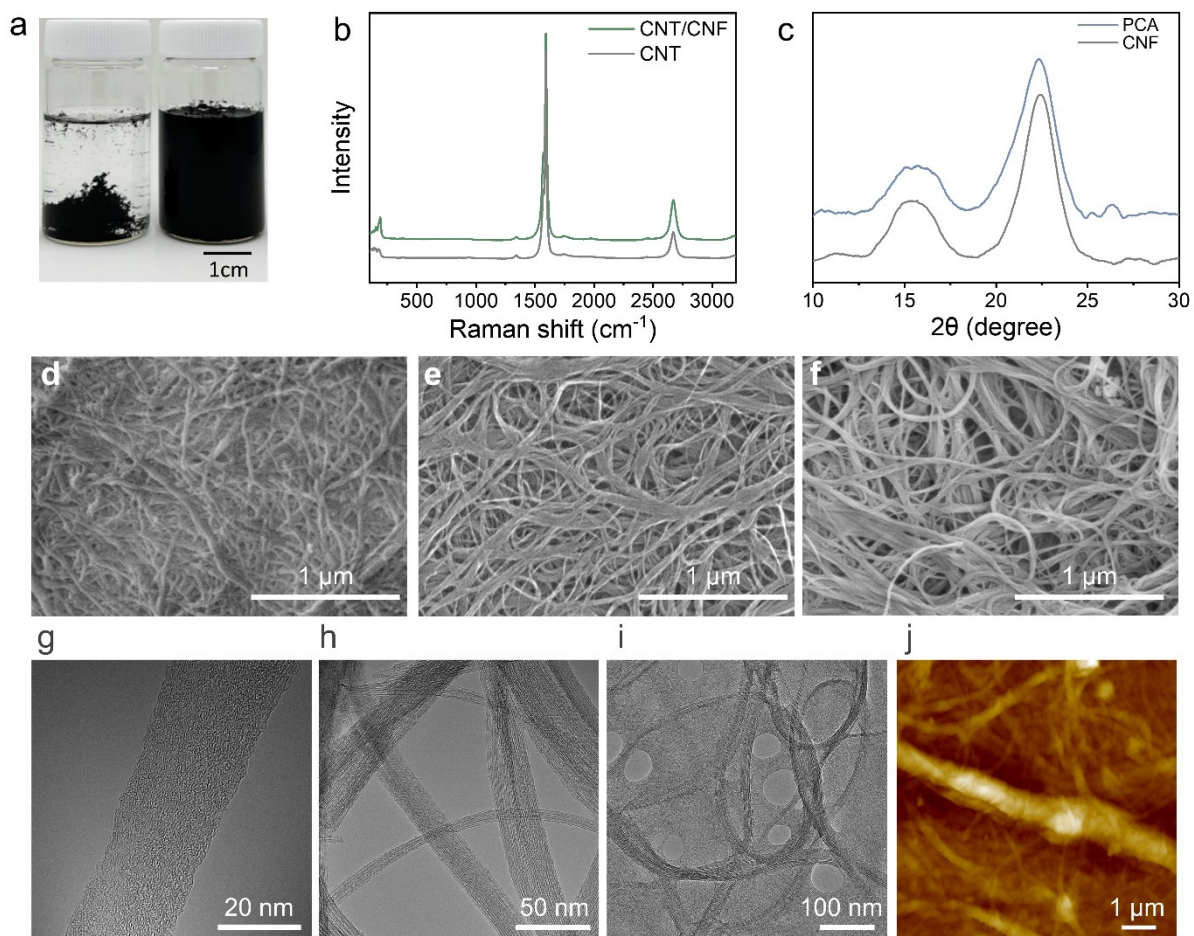

**Fig. S2** a) Photo of CNT in DI water (left) and CNT with CNF in DI water (right) after sonication treatment. b) Raman spectra of pristine CNT and CNT/CNF composite. c) XRD pattern of CNF and CNT/CNF composite. SEM images of d) CNF, e) CNT, and f) CNT/CNF aerogel. TEM images of g) CNF, h) CNT, and i) CNT/CNF. j) AFM image of CNT/CNF.

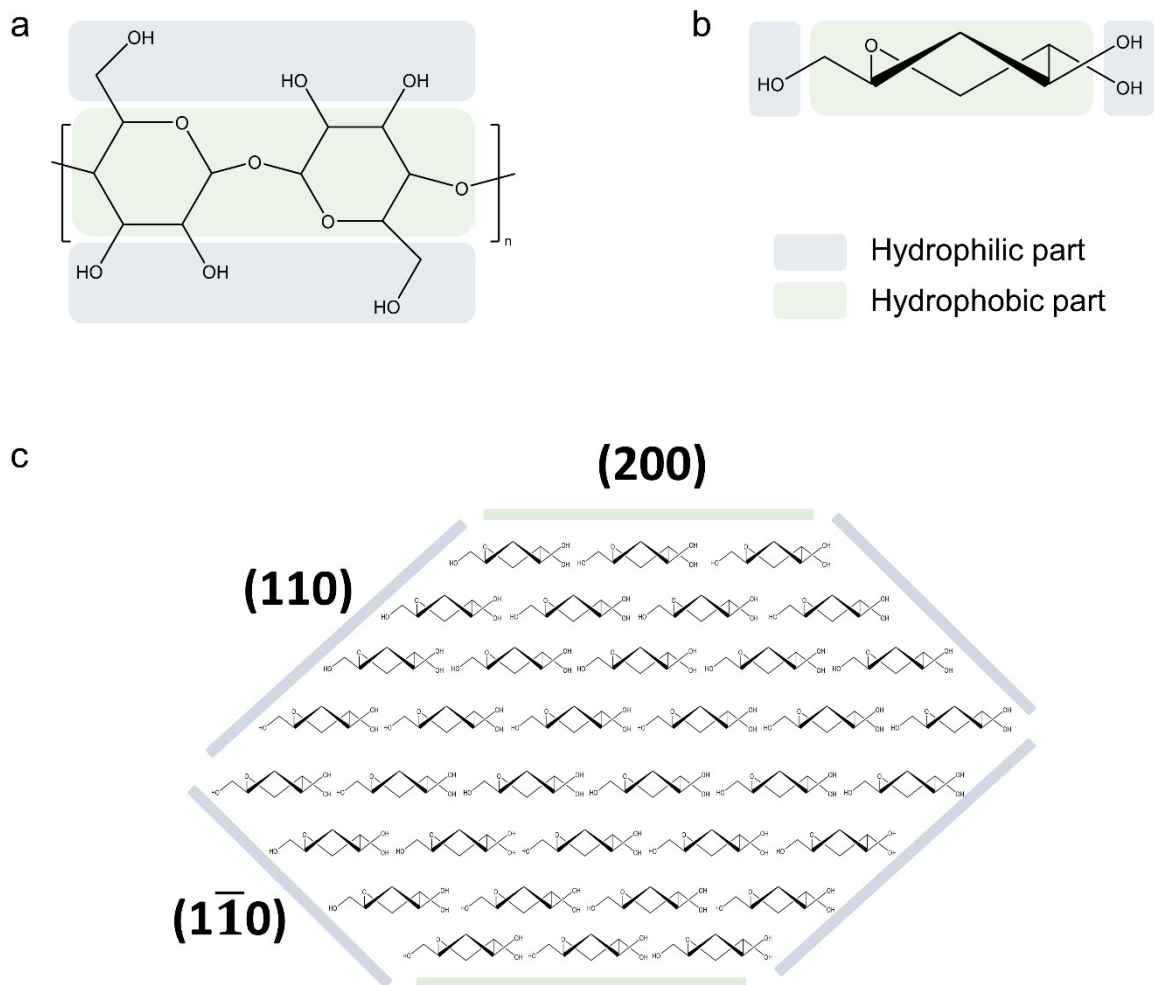

**Fig. S3** Views of cellulose: a) top, b) side of cellulose chain. c) molecular model of cellulose chains.

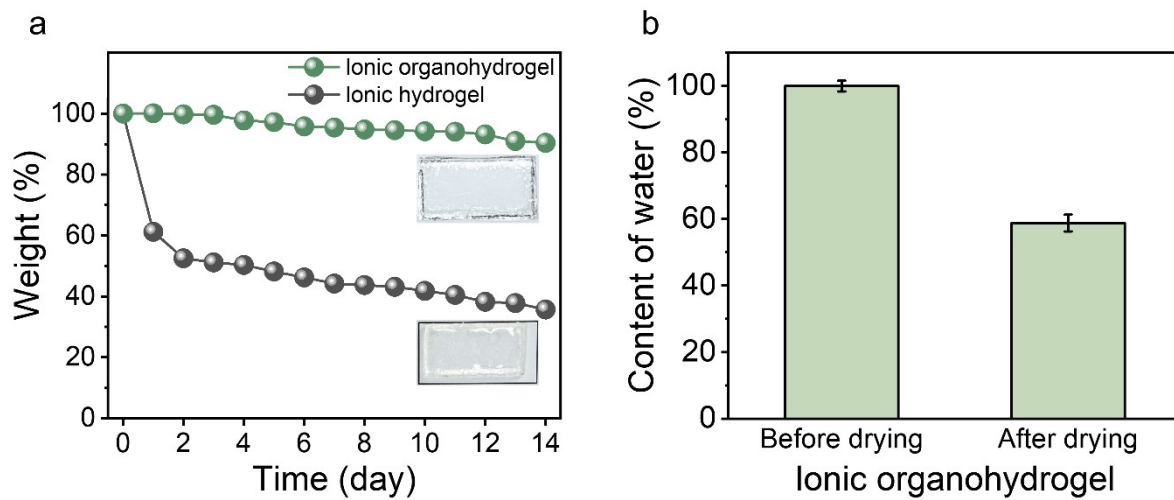

**Fig. S4** a) Water retention of ionic hydrogel and ionic organohydrogel and b) water content in ionic organohydrogel before and after drying.

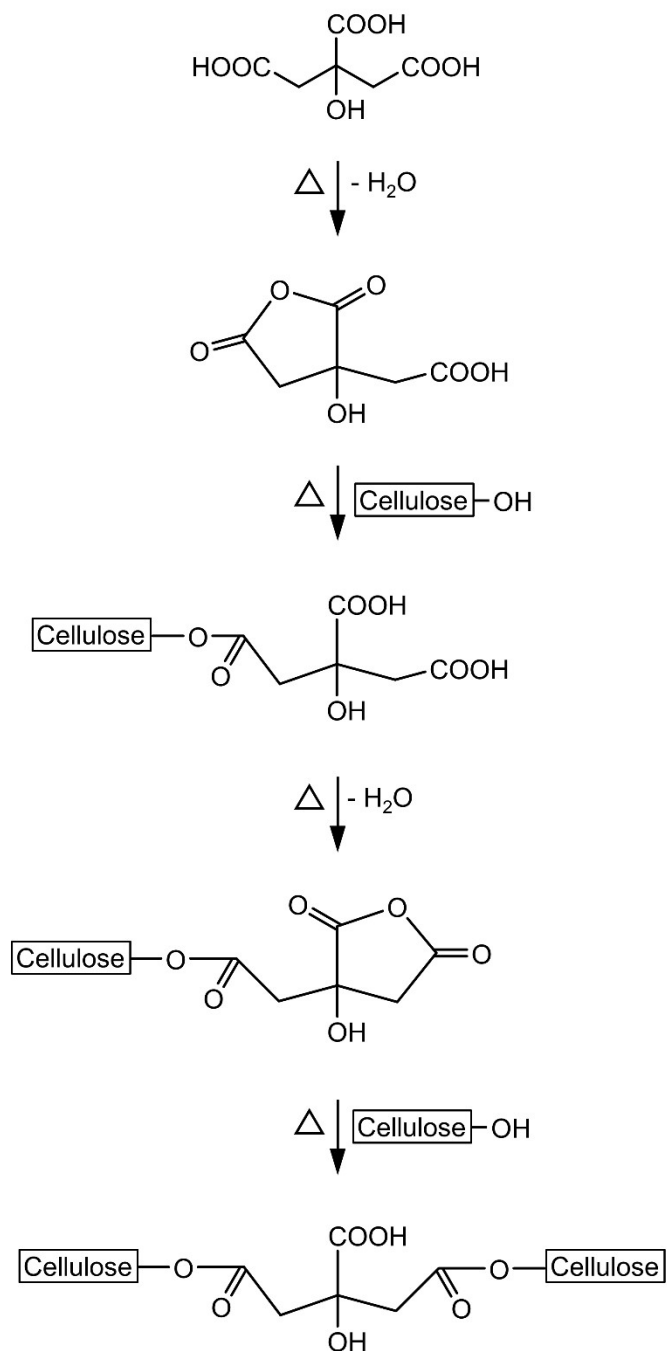

**Fig. S5** Proposed crosslinking reaction mechanism of citric acid with cellulose.

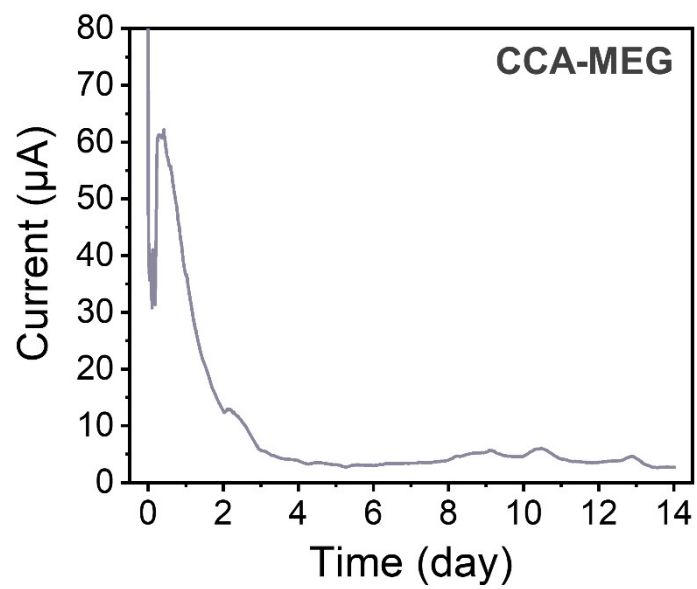

**Fig. S6.** Plot of continuous  $I_{sc}$  of CCA-MEG for 2 weeks.

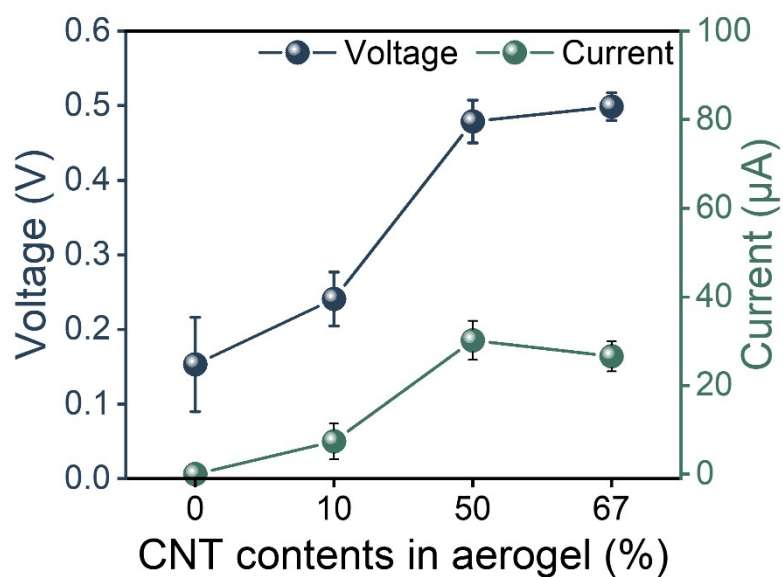

**Fig. S7**  $V_{oc}$  and  $I_{sc}$  corresponding to the ratio of CNT in aerogel of PCA-MEG: a) 0%, b) 10%, c) 50%, and d) 67%.

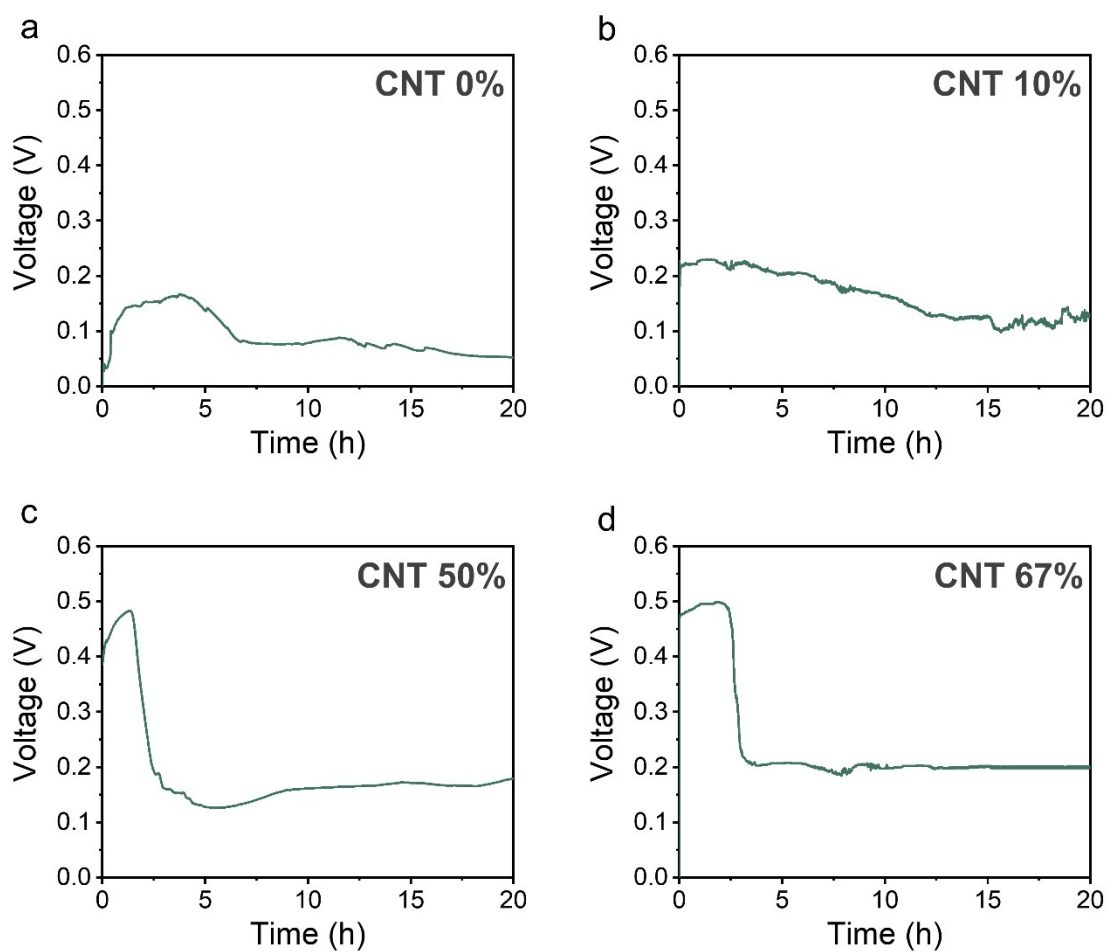

**Fig. S8** Plot of  $V_{oc}$  corresponding to the ratio of CNT in aerogel of PCA-MEG: a) 0%, b) 10%, c) 50%, and d) 67%.



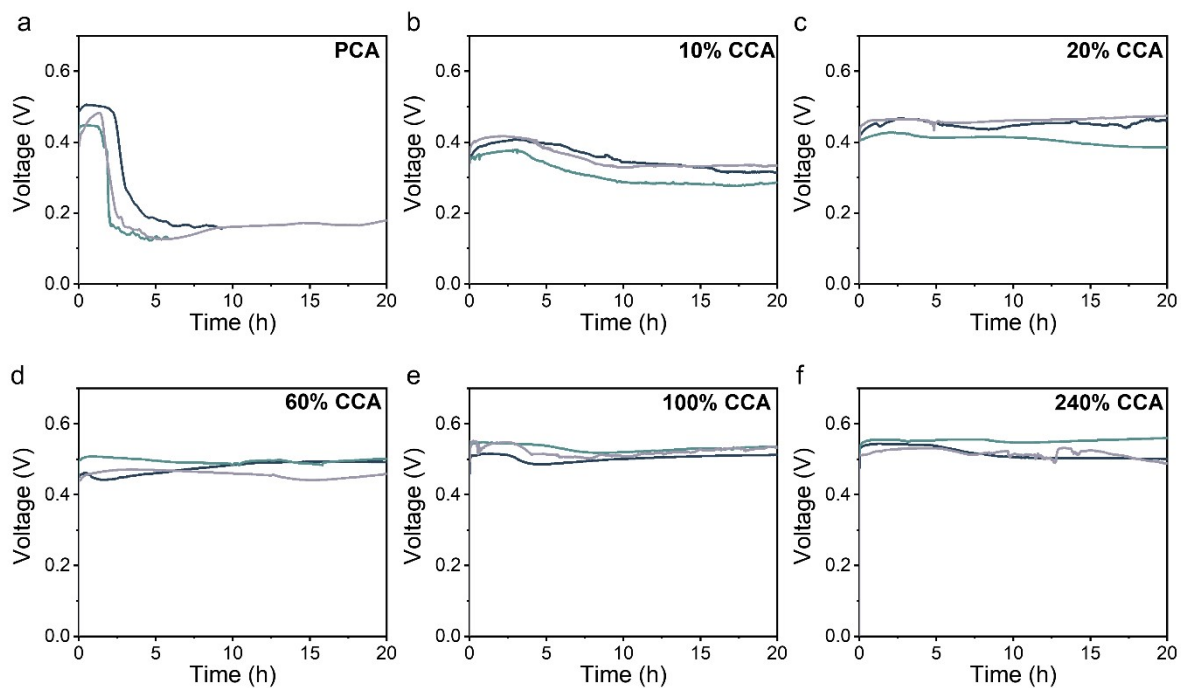

**Fig. S9** Plot of continuous voltage output of a) PCA-MEG and b–f) CCA-MEG with varying CA content for a long duration. b) 10%, c) 20%, d) 60%, e) 100%, and f) 240% CA added by weight of CNF (20 °C and RH 30%).

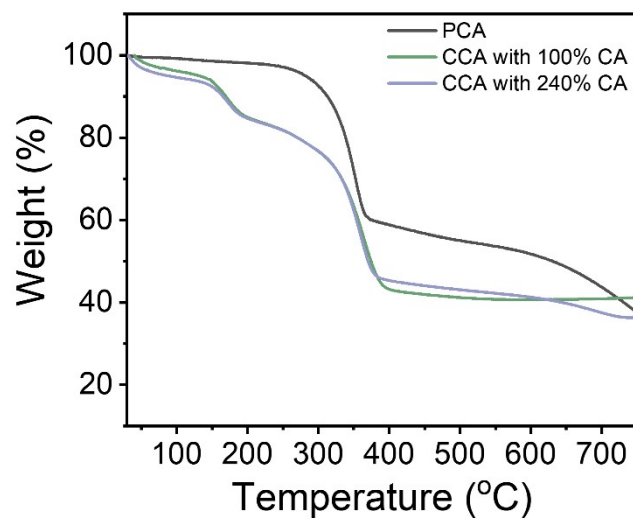

**Fig. S10** Thermogravimetric analysis (TGA) of PCA and CCA with 100% and 240% CA.

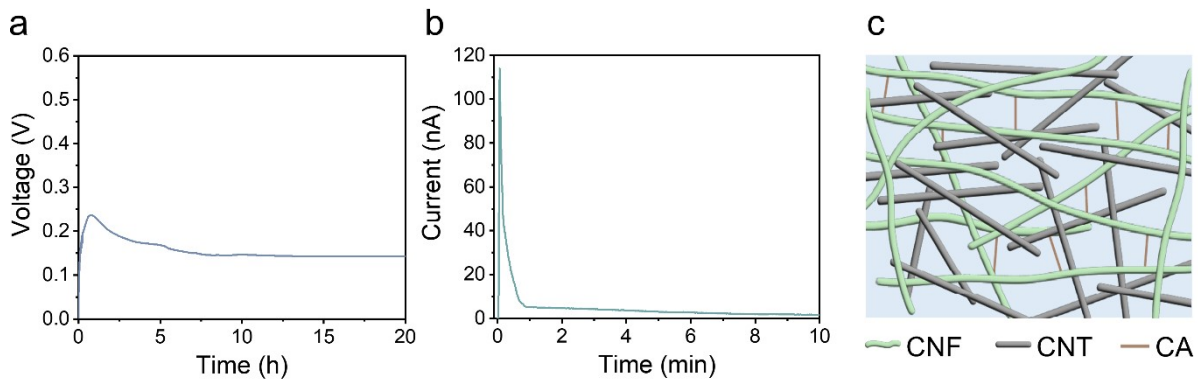

**Fig. S11** a)  $V_{oc}$  and b)  $I_{sc}$  of MEG using crosslinked CNF/CA aerogel without CNT and c) the scheme of network formed by CNTs and crosslinked CNFs.

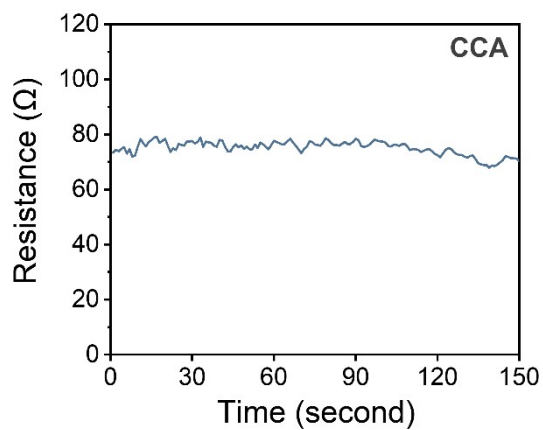

**Fig. S12** Resistance of CCA incorporated with 100% CA.

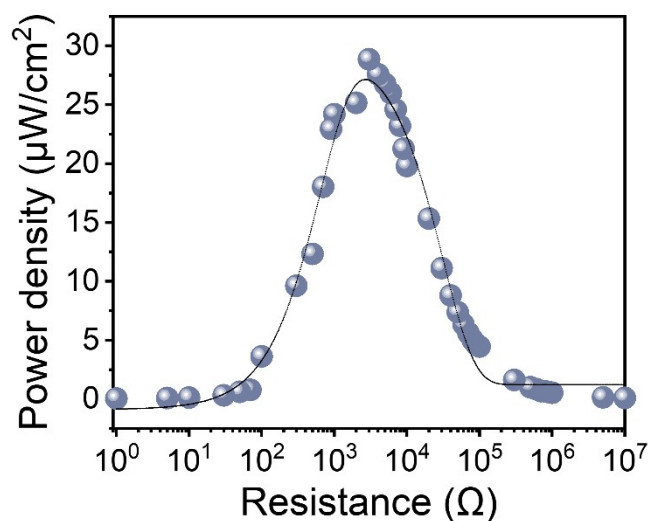

**Fig. S13** Maximum power density obtained by measuring the  $V_{oc}$  and  $I_{sc}$ .

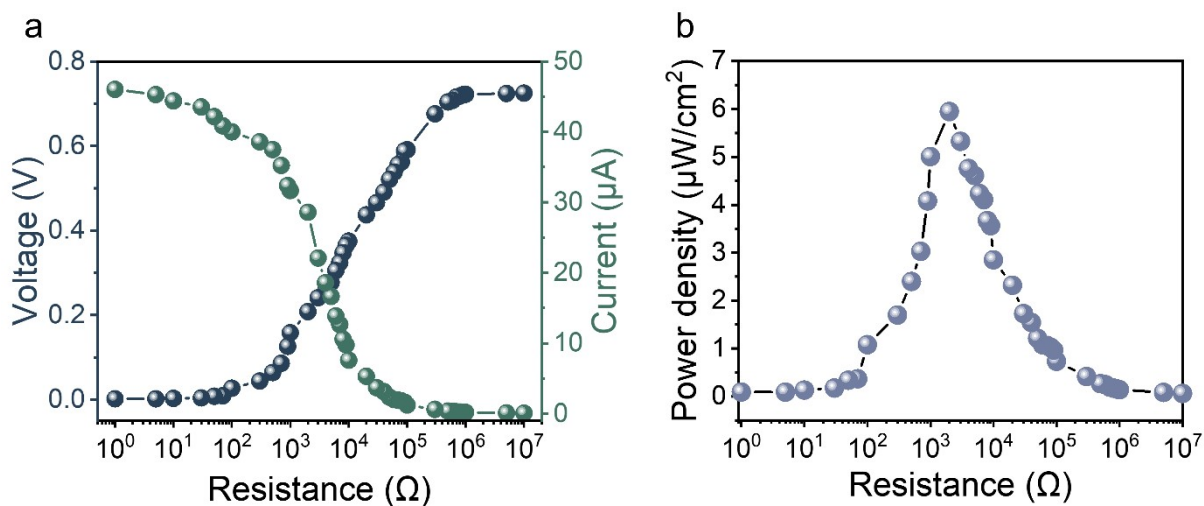

**Fig. S14** a)  $V_{oc}$  and  $I_{sc}$  of the CCA-MEG at 5 minutes after measurement with external resistance and b) power density calculated by measuring  $V_{oc}$  and  $I_{sc}$  measured at 5 minutes operation.

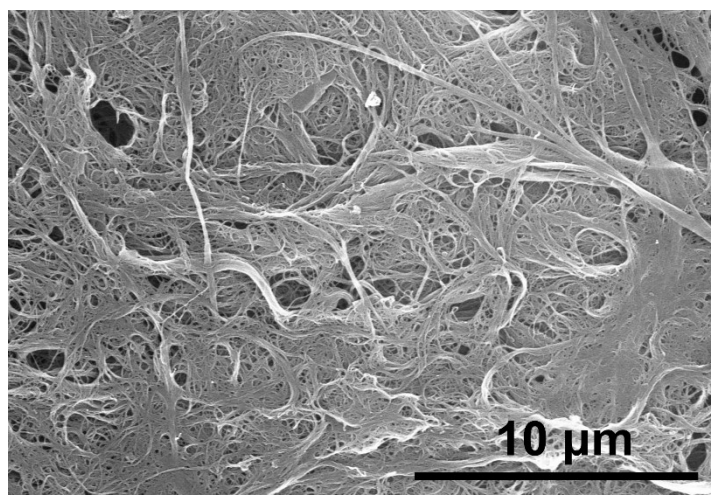

**Fig. S15** A SEM image of CCA after 350 h power generation.

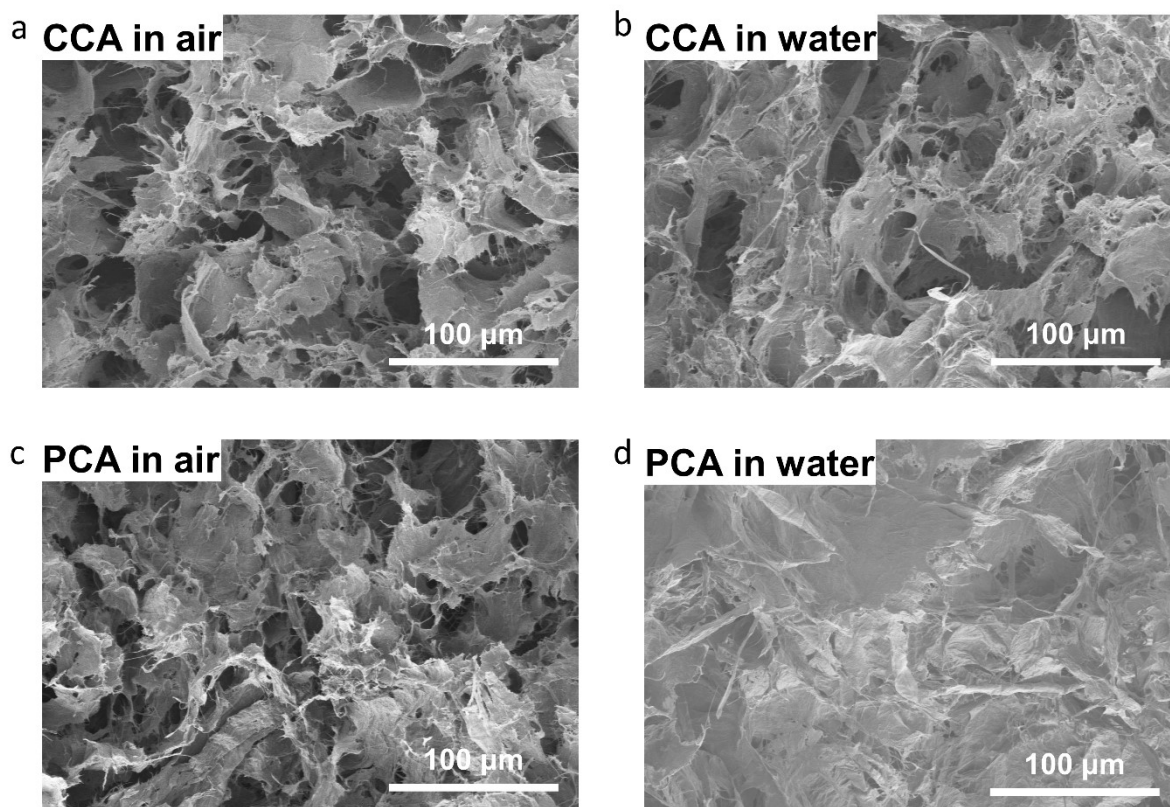

**Fig. S16** SEM images of a) CCA in air, b) CCA in water, c) PCA in air and d) PCA in water.

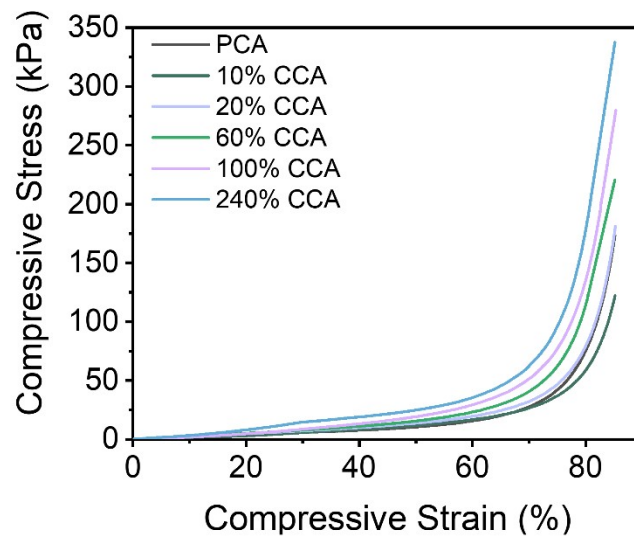

**Fig. S17** Plot of compressive strain–stress curve with PCA and CCA depending on CA content.

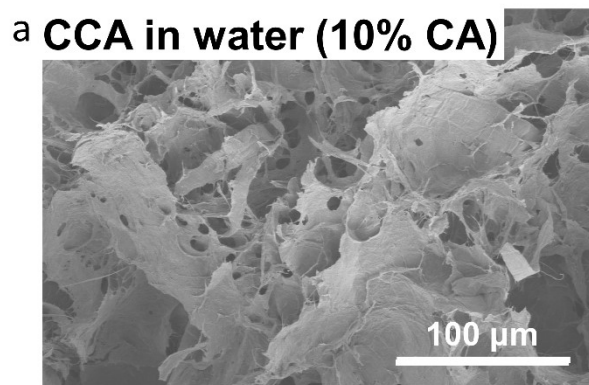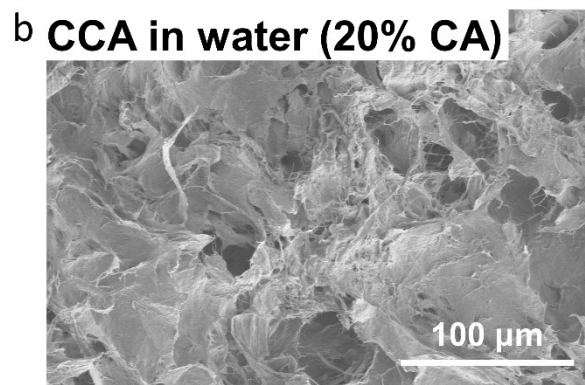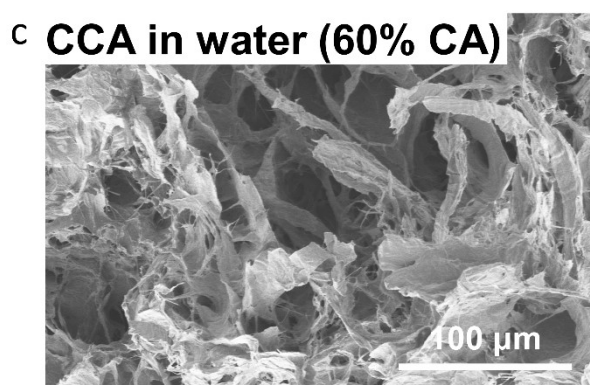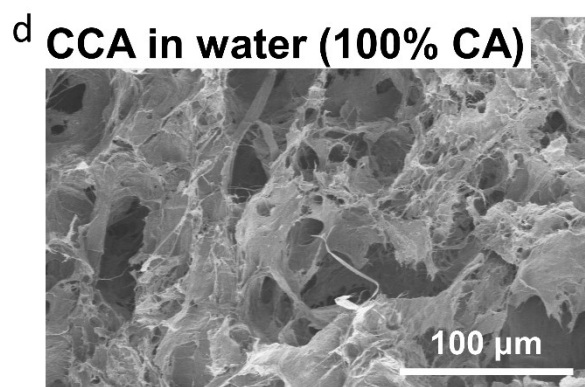

**Fig. S18** SEM images of a) CCA with 10% CA, b) 20% CA, c) 60% CA and d) 100% CA after immersed in water.

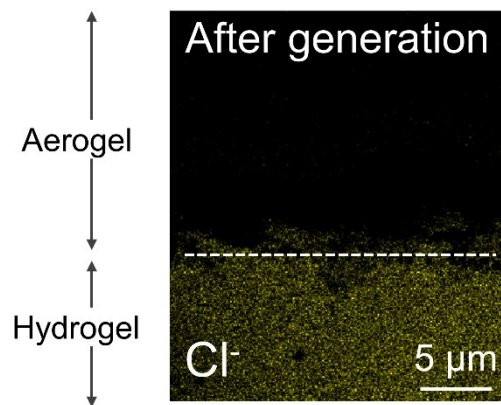

**Fig. S19** EDS mapping data of Cl<sup>-</sup> ions after generation in CCA-MEG.



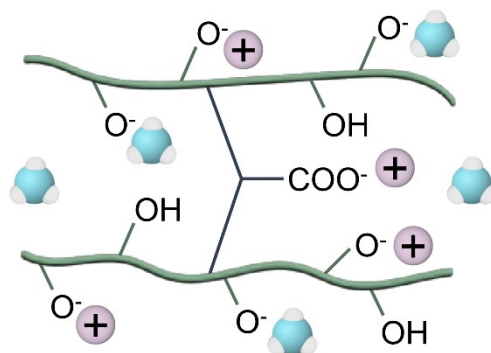

 CNF chain     
   $\text{H}_3\text{O}^+$      
  Cation

**Fig. S20** The schematic illustration of the ionic dissociation contributed by the surface functional groups of CNF.

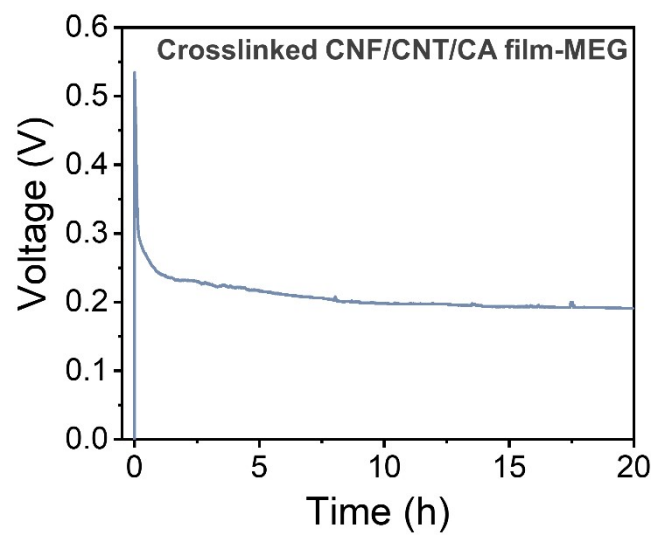

**Fig. S21** Plot of continuous  $V_{oc}$  of crosslinked CNF/CNT/CA film-MEG.

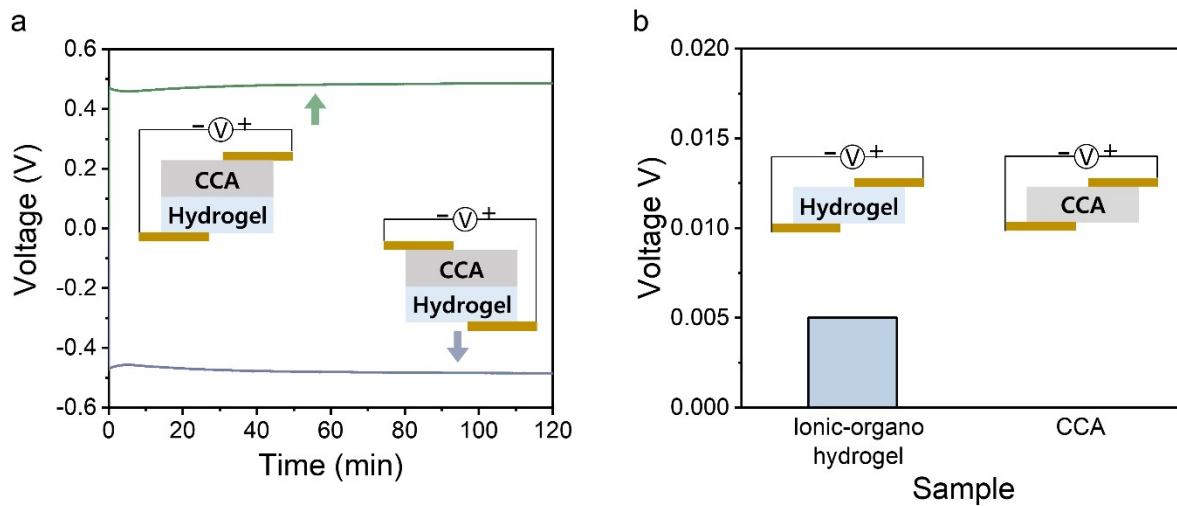

**Fig. S22** a) Continuous  $V_{oc}$  of CCA-MEG devices with reversed connection, and b)  $V_{oc}$  of MEG device with CCA and ionic organohydrogel.

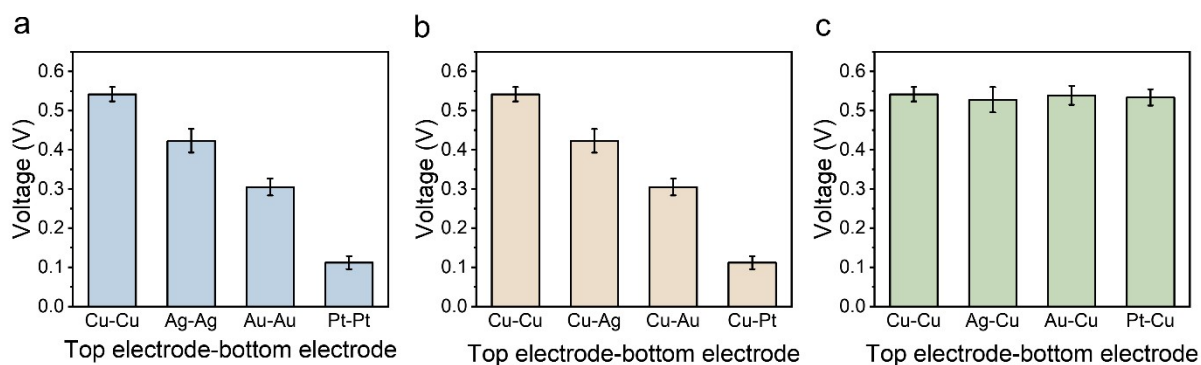

**Fig. S23**  $V_{oc}$  values of CCA-MEGs with various combinations of contact electrodes. a)  $V_{oc}$  values when the top and bottom electrodes are of the same materials. b)  $V_{oc}$  values when the bottom electrode is Cu, Ag, Au, and Pt with a top Cu electrode. c)  $V_{oc}$  values when the top electrode is Cu, Ag, Au, and Pt with the bottom electrode is Cu.

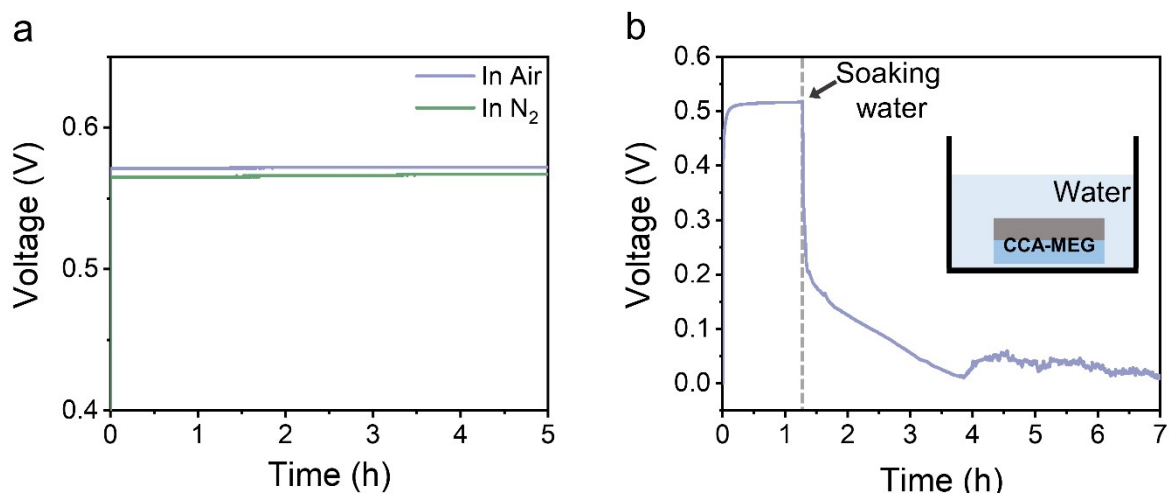

**Fig. S24**  $V_{oc}$  of a CCA-MEG in different atmospheres (air and  $N_2$ ) and b)  $V_{oc}$  of a CCA-MEG in water.

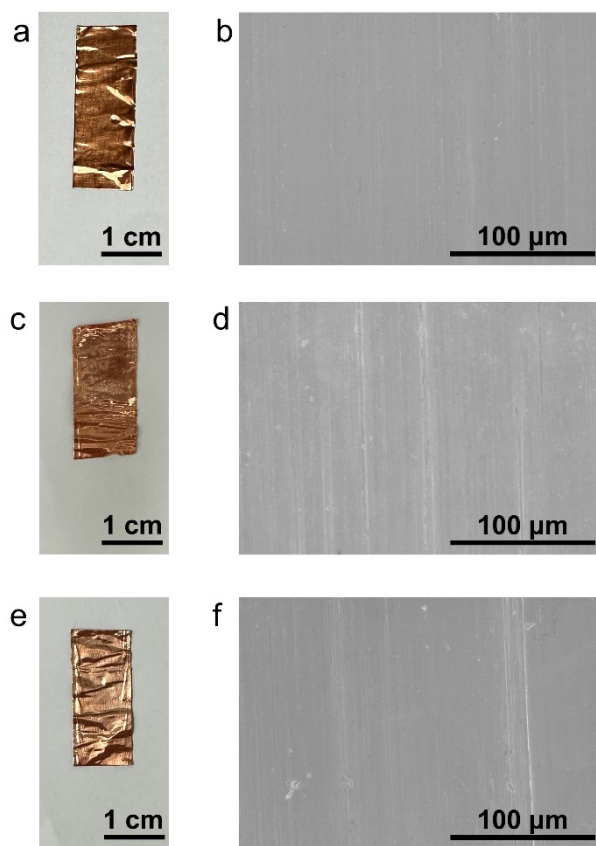

**Fig. S25** a) A photograph of an initial Cu electrode. b) A SEM image of an initial Cu electrode. c) A photograph of a Cu electrode after used for top electrode in a CCA-MEG tested for two months. d) A SEM image of a Cu electrode after used for top electrode in CCA-MEG tested for two months. e) A photograph of a Cu electrode after used for bottom electrode in CCA-MEG tested for two months. f) A SEM image of a Cu electrode after used for bottom electrode in CCA-MEG tested for two months.

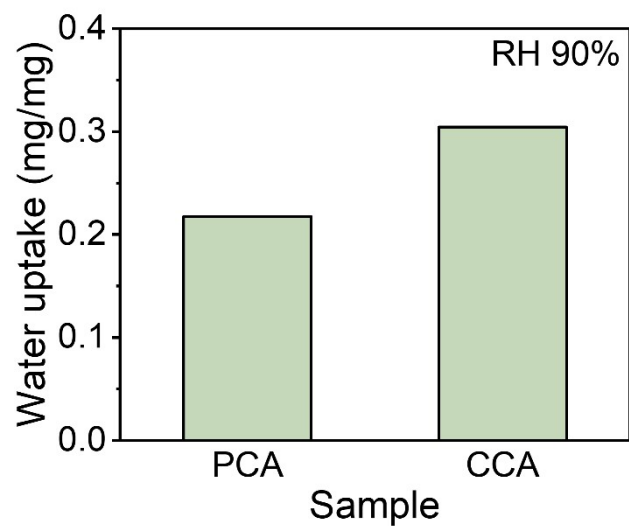

**Fig. S26** Equilibrium moisture uptake of PCA and CCA at RH 90%.

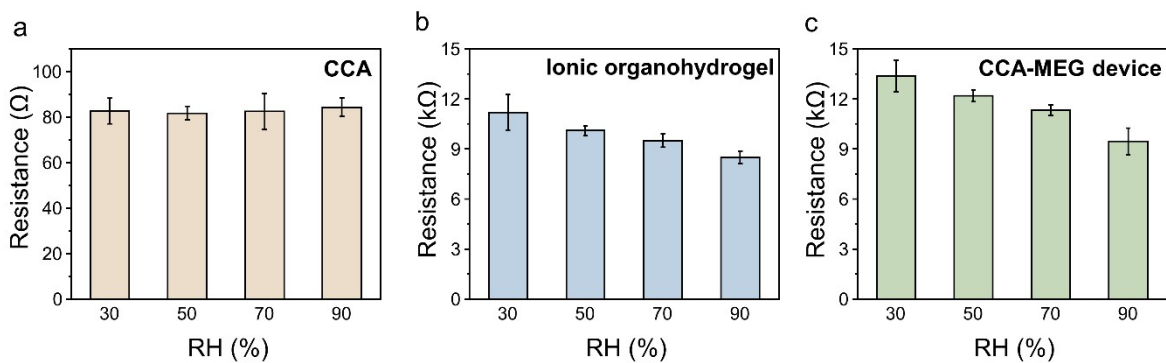

**Fig. S27** The resistance of a) CCA, b) ionic hydrogel and c) CCA-MEG device at various RH.

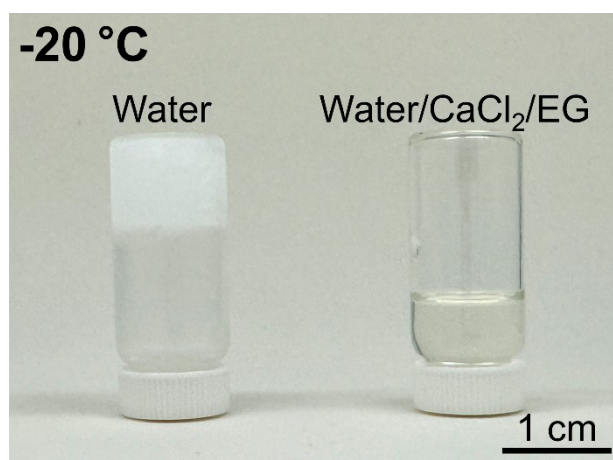

**Fig. S28** Photograph of water (left) and water/ $\text{CaCl}_2$ /Ethylene glycol solution (right) at  $-20\text{ }^{\circ}\text{C}$ .

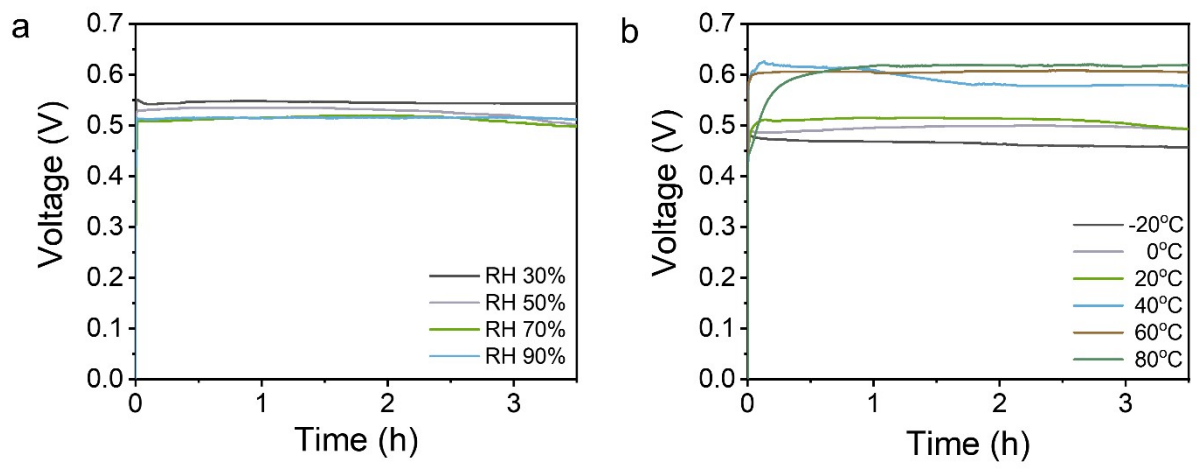

**Fig. S29** Plot of continuous  $V_{oc}$  of CCA-MEG with a) RH at 20 °C and b) temperature at 30% RH.



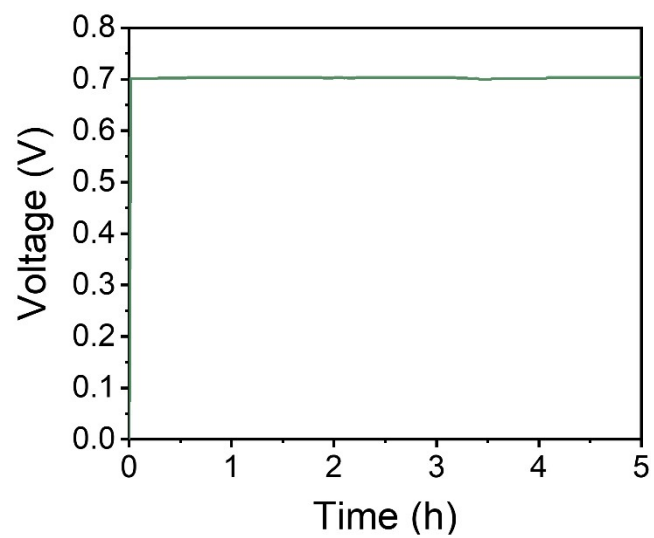

**Fig. S30** Continuous  $V_{oc}$  with CCA-MEG utilizing an ionic organohydrogel with a concentration of 2M ions and a thickness of 3 mm.

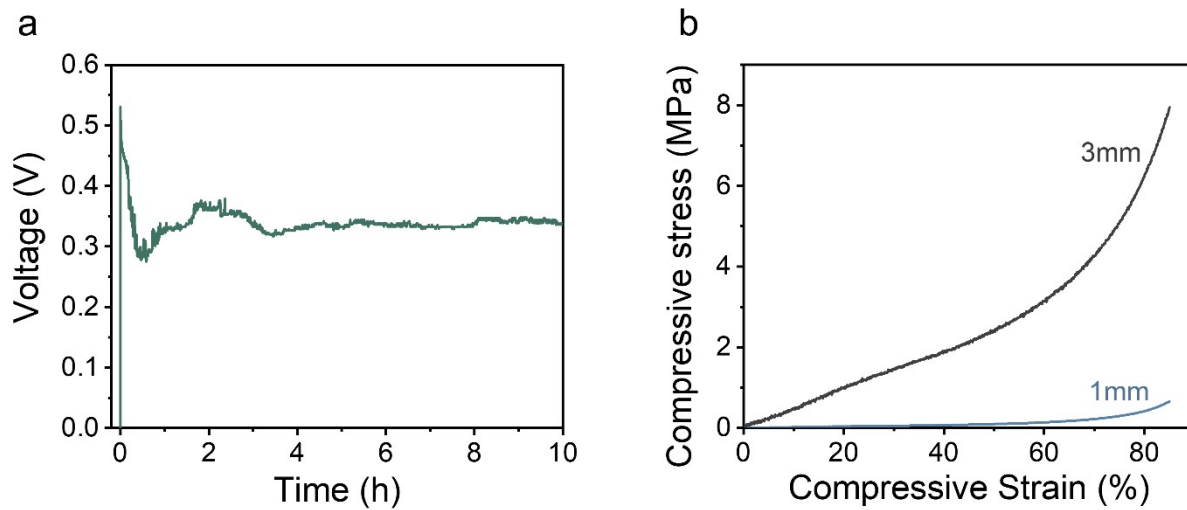

**Fig. S31** a) Continuous  $V_{oc}$  of CCA-MEG with 1 mm thick aerogel and b) compressive strain-stress curve for aerogels with thickness of 1 mm and 3 mm.

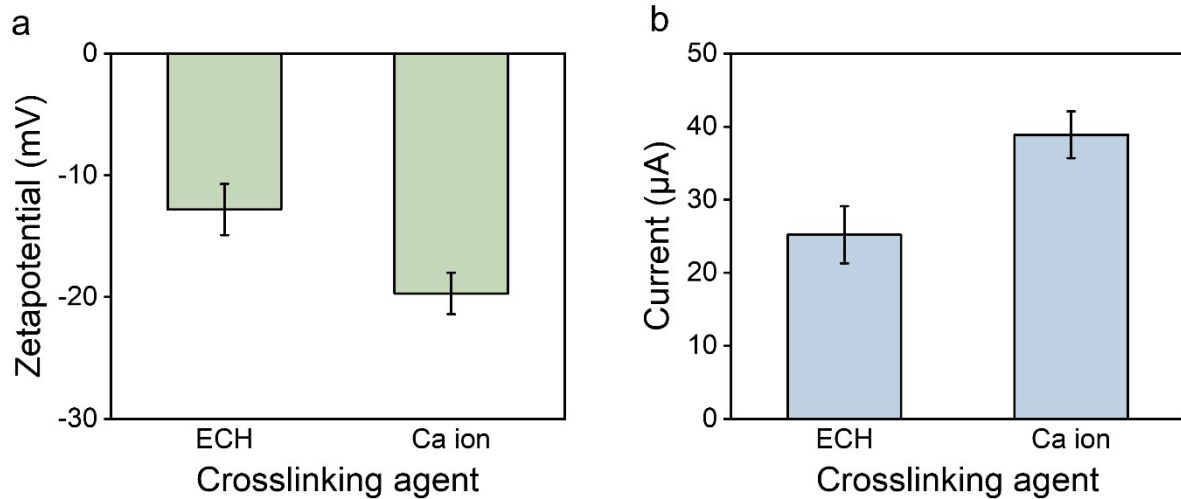

**Fig. S32** a) Zetapotential and b)  $I_{sc}$  of crosslinked CNF/CNT suspension by ECH and calcium ion.

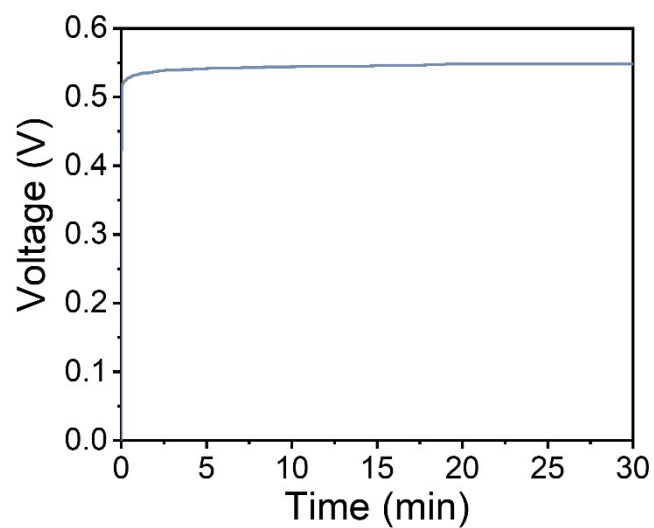

**Fig. S33**  $V_{oc}$  of CCA-MEG using the original CCA and the reused ionic organohydrogel.

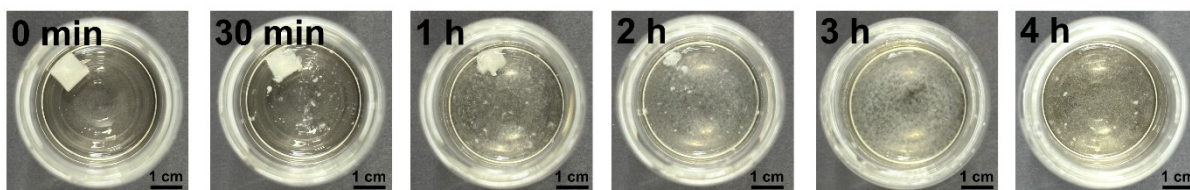

**Fig. S34** Photographs of the degradation of crosslinked CNF aerogel in the cellulase solution.

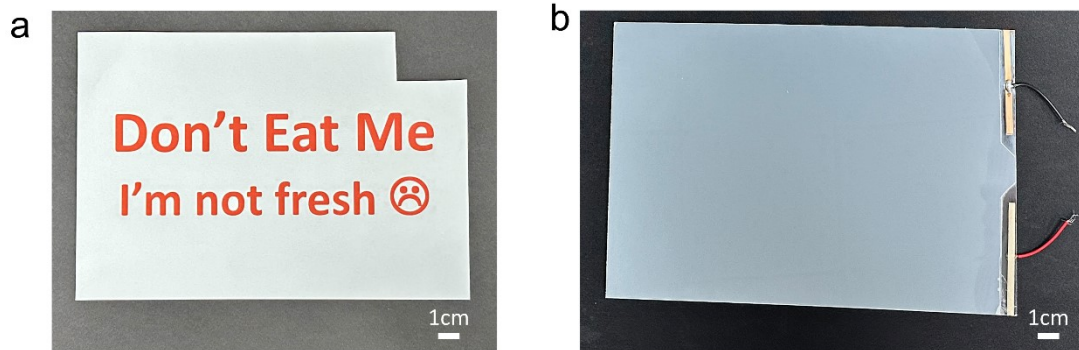

**Fig. S35** Photograph of a) warning label and b) PDLC film for smart package.

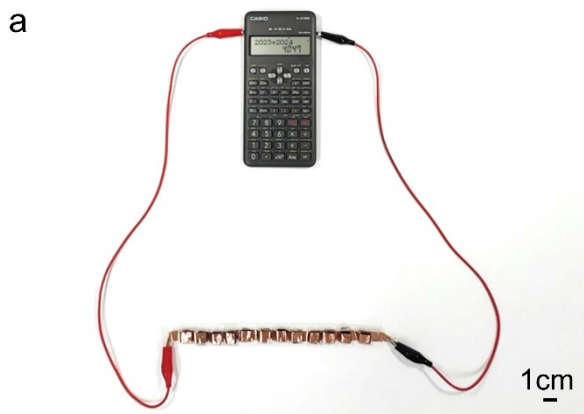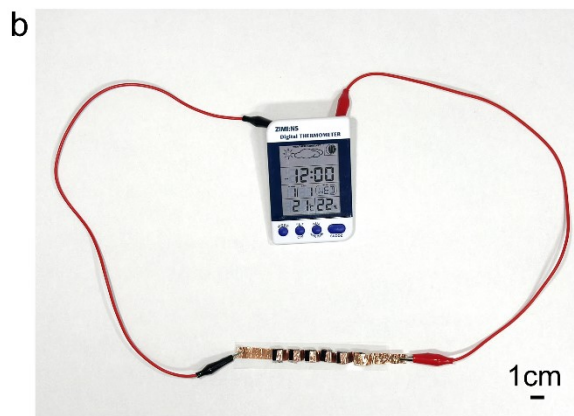

**Fig. S36** a) Photograph of a commercial calculator operated by 12 CCA-MEG units in a series connection. b) Photograph of a commercial thermo-hygrometer operated using 5 CCA-MEG units in series connection.

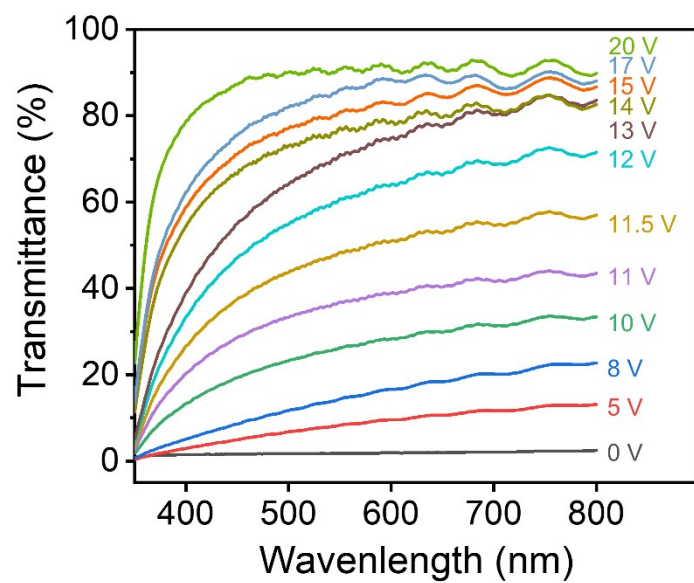

**Fig. S37** Transmittance of the PDLC film at various voltages.



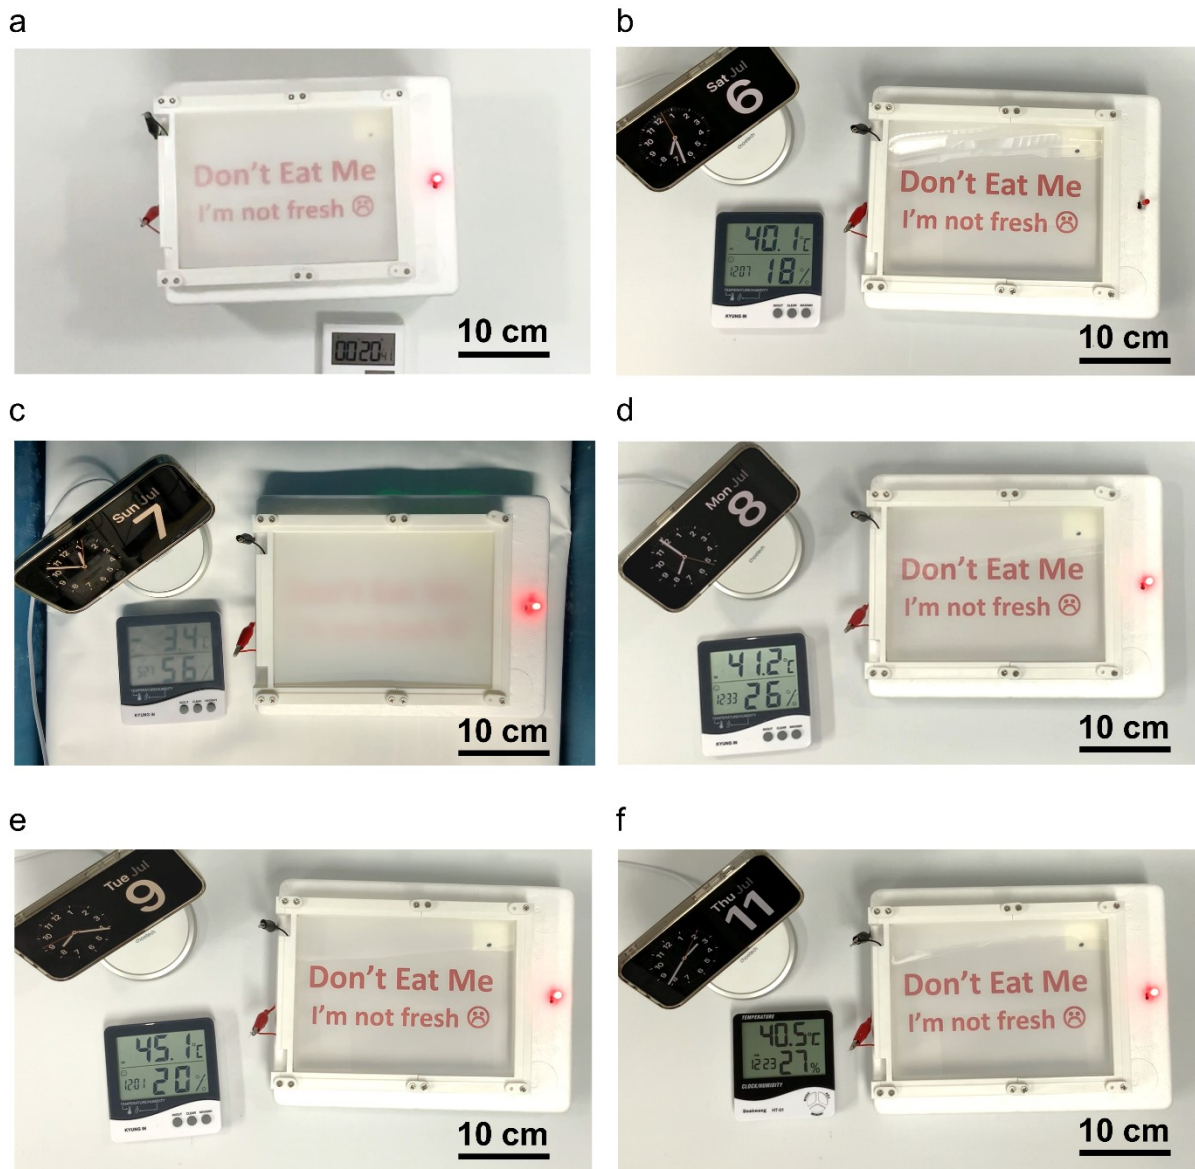

**Fig. S38** Photographs of self-powered MEG based smart package a) after 20 minutes continuous operation, b) after 1 day operation at 40 °C, c) after 1 day operation at -3 °C, d) after 2 days of operation at 45 °C again, e) after re-connection from 3 days of first operation, and f) after on/off switching from 5 days of first operation.

**Table S1** Summary of output performances of biopolymer based MEG devices.

| Key material                                            | Type                    | Voltage<br>(V) | Time<br>(h) | Current<br>( $\mu$ A) | Power<br>density<br>( $\mu$ W/cm <sup>2</sup> ) | Reference |
|---------------------------------------------------------|-------------------------|----------------|-------------|-----------------------|-------------------------------------------------|-----------|
| CNF/CNT/Citric acid                                     | Aerogel                 | 0.25           | > 350       | 38                    | 28                                              | This work |
| Carboxymethyl cellulose                                 | Film                    | 0.3            | 8.3         | 0.015                 | 0.0025                                          | 1         |
| Cellulose acetate                                       | Electrospun<br>membrane | 0.11           | 0.8         | 80                    | 0.0084                                          | 2         |
| TEMPO-CNF                                               | Aerogel                 | 0.115          | 167         | 0.022                 | 0.0024                                          | 3         |
| TEMPO-CNF/Quatern-CNF<br>bilayer                        | Ionic aerogel           | 0.385          | 0.25        | 0.015                 | 0.0017                                          | 4         |
| Cellulose/PEDOT:PSS                                     | Wood                    | 0.7            | 0.8         | 11                    | 0.198                                           | 5         |
| Cellulose acetate with salt                             | Electrospun<br>membrane | 1.1            | 0.17        | 3.5                   | 2.45                                            | 6         |
| Delignified wood                                        | Aerogel                 | 0.55           | 11          | 320                   | 6.75                                            | 7         |
| COF-Cellulose Aerogels                                  | Aerogel                 | 0.3            | 5           | 0.34                  | 0.044                                           | 8         |
| Carbon black coating<br>on cellulose acetate microfiber | Microfiber<br>cylinder  | 0.1604         | 0.5         | 100                   | 4.58                                            | 9         |
| CNT/regenerated cellulose                               | Fiber                   | 0.78           | 0.8         | 0.17                  | 0.0035                                          | 10        |
| LiCl-cellulose paper/<br>carbon black paper bilyaer     | Paper                   | 0.803          | 240         | 3.7                   | 0.67                                            | 11        |
| Cellulose filter paper/carbon                           | Paper                   | 0.668          | 168         | 1.03                  | 2.63                                            | 12        |
| CNT/CMC/CNF                                             | Aerogel                 | 0.84           | 1           | 6.4                   | 0.871                                           | 13        |
| MWNT/cellulose                                          | Film                    | 0.275          | 45          | 2.21                  | 0.163                                           | 14        |
| MXene/Paper/Citric acid                                 | Paper                   | 0.25           | 150         | 7.6                   | 2.1                                             | 15        |
| MoS <sub>2</sub> -functionalized filter paper           | Paper                   | 0.302          | 0.1         | 21.1                  | 5                                               | 16        |
| MOF/modified NFC                                        | Aerogel                 | 0.65           | 0.7         | 3.7                   | 1.12                                            | 17        |
| AgNW coating on cellulose acetate                       | Membrane                | 0.25           | 15          | 0.12                  | 0.4                                             | 18        |
| Protein wires                                           | Film                    | 0.5            | 1500        | 17                    | 5.00                                            | 19        |
| $\beta$ -lactoglobulin (milk protein)                   | Nanofibril              | 0.65           | 240         | 2.9                   | 9.02                                            | 20        |
| Gelatin protein                                         | Film                    | 0.71           | 0.003       | 7.77                  | 5.5                                             | 21        |
| Protein/PEG                                             | Film                    | 1.45           | 3           | 113                   | 11.6                                            | 22        |
| Microorganism (G.sulfurreducens)                        | Film                    | 0.5            | 700         | 2                     | 1                                               | 23        |
| Microorganism (G.sulfurreducens)                        | Film                    | 0.3            | 10          | 13                    | 5.1                                             | 24        |
| Nb <sub>2</sub> CT <sub>x</sub> /sodium alginate        | Film                    | 0.5            | 720         | 1.6                   | 0.5                                             | 25        |
| Oxi-silk/AgNP                                           | Fiber                   | 0.28           | 0.28        | 0.19                  | 0.05                                            | 26        |
| Sodium alginate/CNT                                     | Fiber                   | 0.38           | 36          | 1.74                  | 9.5                                             | 27        |
| Cationic silk                                           | Nanofibril              | 0.12           | 0.056       | 0.11                  | 0.01                                            | 28        |

**Table S2** Summary of output performances of recent MEG devices.

|                        | Key material                                     | Voltage<br>(V) | Time<br>(h) | Current<br>( $\mu$ A) | Power<br>density<br>( $\mu$ W/cm <sup>2</sup> ) | Recycle<br>possibility | Reference |
|------------------------|--------------------------------------------------|----------------|-------------|-----------------------|-------------------------------------------------|------------------------|-----------|
| Biomaterial            | CNF/CNT/Citric acid                              | 0.25           | > 350       | 38                    | 28.9                                            | O                      | This work |
|                        | Delignified wood                                 | 1.1            | 11          | 320                   | 6.75                                            | O                      | 7         |
|                        | Cellulose filter paper/carbon                    | 0.803          | 168         | 1.03                  | 2.63                                            | O                      | 12        |
|                        | Protein wires                                    | 0.5            | 1500        | 17                    | 5                                               | O                      | 19        |
|                        | Milk protein                                     | 0.65           | 240         | 2.9                   | 9.02                                            | O                      | 20        |
|                        | Gelatin                                          | 0.71           | 0.003       | 7.77                  | 5.5                                             | O                      | 21        |
|                        | Microorganism                                    | 0.3            | 10          | 13                    | 5.1                                             | O                      | 24        |
|                        | Nb <sub>2</sub> CT <sub>x</sub> /sodium alginate | 0.5            | 720         | 1.6                   | 0.5                                             | O                      | 25        |
|                        | Oxi-silk/AgNP                                    | 0.28           | 0.28        | 0.19                  | 0.05                                            | O                      | 26        |
|                        | Sodium alginate/CNT                              | 0.38           | 36          | 1.74                  | 9.5                                             | O                      | 27        |
|                        | Cationic silk                                    | 0.12           | 0.056       | 0.11                  | 0.01                                            | O                      | 28        |
| Synthetic<br>Polymer   | PSSA:PDDA/Al                                     | 1.1            | 13.9        | 11.3                  | 2.60                                            | X                      | 29        |
|                        | PAN:PSSA                                         | 1.1            | 11.1        | 1.35                  | 1.48                                            | X                      | 30        |
|                        | PAM:AMPS hydrogel                                | 0.81           | 3           | 480                   | 53.30                                           | X                      | 31        |
|                        | PSS membrane                                     | 0.8            | 12          | 120                   | 13.00                                           | X                      | 32        |
|                        | PAN-PVP-Ag core-shell yarn                       | 0.8            | 8.3         | 14.3                  | 0.61                                            | X                      | 33        |
|                        | PVA/PSS textile                                  | 1              | 5           | 1.7                   | 0.10                                            | X                      | 34        |
| Carbon                 | Porous GO membrane                               | 0.45           | 0.13        | 0.9                   | 2.02                                            | X                      | 35        |
|                        | CNT/AAO/In-Ga                                    | 1.1            | 720         | 1.5                   | 1.30                                            | X                      | 36        |
|                        | GO/PAAS composite                                | 0.6            | 120         | 12                    | 0.07                                            | X                      | 37        |
|                        | GO-CNT                                           | 0.76           | 24          | 73                    | 15.80                                           | X                      | 38        |
|                        | GO                                               | 1.39           | 11          | 120                   | 110.00                                          | X                      | 39        |
|                        | Carbon black cotton                              | 0.3            | 2.5         | 50                    | 0.70                                            | X                      | 40        |
|                        | CNT/Mxene                                        | 0.36           | 0.14        | 520                   | 1.55                                            | X                      | 41        |
| Inorganic<br>materials | TiO <sub>2</sub> wire                            | 0.52           | 0.04        | 8                     | 4.00                                            | X                      | 42        |
|                        | SiO <sub>2</sub> /Graphene sphere                | 0.34           | 5           | 1                     | 0.03                                            | X                      | 43        |

## References

1. X. Gao, T. Xu, C. Shao, Y. Han, B. Lu, Z. Zhang and L. Qu, *J. of Mater. Chem. A*, 2019, **7**, 20574-20578.
2. Q. Lyu, B. Peng, Z. Xie, S. Du, L. Zhang and J. Zhu, *ACS Appl. Mater. Interfaces*, 2020, **12**, 57373-57381.
3. M. J. Li, L. Zong, W. Q. Yang, X. K. Li, J. You, X. C. Wu, Z. H. Li and C. X. Li, *Adv. Funct. Mater.*, 2019, **29**, 1901798.
4. Z. Li, J. Wang, L. Dai, X. Sun, M. An, C. Duan, J. Li and Y. Ni, *ACS Appl. Mater. Interfaces*, 2020, **12**, 55205-55214.
5. C. Wang, S. S. Tang, B. X. Li, J. C. Fan and J. Zhou, *Chem Eng J*, 2023, **455**, 140568.
6. J. C. Zhang, Y. Hou, L. R. Lei and S. Q. Hu, *J. Membrane Sci.*, 2022, **662**, 120962
7. K. Zhang, X. Li, C. Yan, R. Shi, Z. Fang, S. Zhou, R. Cao and J. Tian, *ACS Nano*, 2024, **18**, 10259-10269.
8. X. Xie, X. Wang, Y. Zhang, L. Fang, J. Feng, S. Liu, D. Yu, F. Zhu and X. Chen, *ACS Appl. Mater. Interfaces*, 2024, **16**, 3279-3288.
9. J. Youm, S. H. Lee, I. H. Cho, D. Jeong, J. Bang, H. H. Park and M. S. Kim, *Surf. Interfaces*, 2023, **38**, 102853.
10. J. Chen, Y. Li, Y. Zhang, D. Ye, C. Lei, K. Wu and Q. Fu, *Adv. Funct. Mater.*, 2022, **32**, 2203666
11. J. Tan, S. Fang, Z. Zhang, J. Yin, L. Li, X. Wang and W. Guo, *Nat. Commun.*, 2022, **13**, 3643.
12. L. Huang, Y. Tang, W. Liu, Q. Hu and X. Wei, *Carbohydr. Polym.*, 2024, **326**, 121649.
13. H. Zhong, S. Wang, Z. Wang and J. Jiang, *Chem. Eng. J.*, 2024, **486**, 150203.
14. R. Zhang, R. Zheng, Z. Zheng, Q. Chen, N. Jiang, P. Tang, H. Wang and Y. Bin, *Int. J. Biol. Macromol.*, 2024, **263**, 130022.
15. L. Y. Yang, L. Zhang and D. P. Sun, *ACS Appl. Mater. Inter.*, 2022, **14**, 53615–53626
16. P. Wen, J. Ren and S. J. Ling, *ACS Appl. Electron. Mater.*, 2023, **5**, 2082-2092.
17. X. Han, W. H. Zhang, X. P. Che, L. F. Long, M. J. Li and C. X. Li, *J. of Mater. Chemistry A*, 2022, **10**, 8356-8363.
18. T. Chen, D. L. Zhang, X. Z. Tian, S. Qiang, C. Sun, L. Dai, M. Y. Zhang, Y. H. Ni and X. Jiang, *Carbohydr. Polym.*, 2022, **294**, 119809.
19. X. Liu, H. Gao, J. E. Ward, X. Liu, B. Yin, T. Fu, J. Chen, D. R. Lovley and J. Yao, *Nature*, 2020, **578**, 550-554.
20. J. Liu, L. Huang, W. He, X. Cai, Y. Wang, L. Zhou and Y. Yuan, *Nano Energy*, 2022, **102**, 107709.
21. S. Mandal, S. Roy, A. Mandal, T. Ghoshal, G. Das, A. Singh and D. K. Goswami, *ACS Appl. Electron. Mater.*, 2020, **2**, 780-789.
22. R. Zhu, Y. Zhu, L. Hu, P. Guan, D. Su, S. Zhang, C. Liu, Z. Feng, G. Hu, F. Chen, T. Wan, X. Guan, T. Wu, R. Joshi, M. Li, C. Cazorla, Y. Lu, Z. Han, H. Xu and D. Chu, *Energ. Environ. Sci.*, 2023, **16**, 2338-2345.
23. X. Liu, T. Ueki, H. Gao, T. L. Woodard, K. P. Nevin, T. Fu, S. Fu, L. Sun, D. R. Lovley and J. Yao, *Nat. Commun.*, 2022, **13**, 4369.
24. G. Ren, Q. Hu, J. Ye, X. Liu, S. Zhou and Z. He, *Chem. Eng. J.*, 2022, **441**, 135921.
25. Q. Zhao, Y. Jiang, Z. Duan, Z. Yuan, J. Zha, Z. Wu, Q. Huang, Z. Zhou, H. Li, F. He, Y. Su, C. Tan and H. Tai, *Chem. Eng. J.*, 2022, **438**, 135588.
26. Z. Wang, J. Li, C. Shao, X. Lin, Y. n. Yang, N. Chen, Y. Wang and L. Qu, *Nano Energy*, 2021, **90**, 106529.
27. R. Zhang, H. Wang, M. Qu, S. Li, Y. Ma, X. Li, P. Tang and Y. Bin, *Chem. Eng. J.*, 2023, **473**, 145325.

28. W. Q. Yang, L. L. Lv, X. K. Li, X. Han, M. J. Li and C. X. Li, *ACS Nano*, 2020, **14**, 10600-10607.
29. T. He, H. Wang, B. Lu, T. Guang, C. Yang, Y. Huang, H. Cheng and L. Qu, *Joule*, 2023, **7**, 935-951.
30. Z. Sun, L. Feng, X. Wen, L. Wang, X. Qin and J. Yu, *Mater. Horiz.*, 2021, **8**, 2303-2309.
31. H. Zhang, N. He, B. Wang, B. Ding, B. Jiang, D. Tang and L. Li, *Adv. Mater.*, 2023, **35**, e2300398.
32. Y. Huang, K. Zhou, H. Cheng, T. He, H. Wang, J. Bai, C. Yang, T. Guang, H. Yao, F. Li, G. Hou, Z. Xu and L. Qu, *Adv. Funct. Mater.*, 2023, **34**, 2308620.
33. Z. Sun, X. Wen, S. Guo, M. Zhou, L. Wang, X. Qin and S. C. Tan, *Nano Energy*, 2023, **116**, 108748.
34. W. He, H. Wang, Y. Huang, T. He, F. Chi, H. Cheng, D. Liu, L. Dai and L. Qu, *Nano Energy*, 2022, **95**, 107017.
35. H. Cheng, Y. Huang, F. Zhao, C. Yang, P. Zhang, L. Jiang, G. Shi and L. Qu, *Energ. Environ. Sci.*, 2018, **11**, 2839-2845.
36. Y. Zhang, T. Yang, K. Shang, F. Guo, Y. Shang, S. Chang, L. Cui, X. Lu, Z. Jiang, J. Zhou, C. Fu and Q. C. He, *Nat. Commun.*, 2022, **13**, 3484.
37. Y. Huang, H. Cheng, C. Yang, H. Yao, C. Li and L. Qu, *Energ. Environ. Sci.*, 2019, **12**, 1848-1856.
38. F. Chen, S. Zhang, P. Guan, Y. Xu, T. Wan, C. H. Lin, M. Li, C. Wang and D. Chu, *Small*, 2023, 2304572.
39. K. Fan, M. Peng, J. Liu, X. Li, X. Wang, B. Kong and X. Liu, *Chem Eng J*, 2023, **461**.
40. X. Wen, Z. Sun, X. Xie, Q. Zhou, H. Liu, L. Wang, X. Qin and S. C. Tan, *Adv. Funct. Mater.*, 2023, **34**, 2311128.
41. X. Zhang, Y. Wang, X. Zhang, C.-W. Lou, J.-H. Lin and T.-T. Li, *Chem. Eng. J.*, 2023, **465**, 142582.
42. D. Shen, M. Xiao, G. Zou, L. Liu, W. W. Duley and Y. N. Zhou, *Adv. Mater.*, 2018, **30**, e1705925.
43. C. Xu, C. Fu, Z. Jiang, T. Yang and M. Xin, *ACS Appl. Nano Mater.*, 2023, **6**, 5930-5938.
